# Supplementary material for: Quality-of-Life (QOL) during Screening for Phase 1 Trial Studies in Patients with Advanced Solid Tumors and Its Impact on Risk for Serious Adverse Events
Source: PubMed Central journal article supplement (PMC5532609; doi:10.3390/cancers9070073), 2017-06-26
Supplement: cancers-09-00073-s001.pdf [file cancers-09-00073-s001.pdf]

# Supplementary Materials: Quality-of-Life (QOL) during Screening for Phase 1 Trial Studies in Patients with Advanced Solid Tumors and Its Impact on Risk for Serious Adverse Events

Sidra Anwar, Wei Tan, Chi-Chen Hong, Sonal Admane, Askia Dozier, Francine Siedlecki, Amy Whitworth, Ann Marie DiRaddo, Dawn DePaolo, Sandra M. Jacob, Wen Wee Ma, Austin Miller, Alex A. Adjei and Grace K. Dy

**Table S1.** Summary of 22 phase 1 trials.

|                                               |                                                                           |
|-----------------------------------------------|---------------------------------------------------------------------------|
| Single-drug regimens (N = 11)                 | Combination regimens (N = 11)                                             |
| Vaccine (N = 1)                               | Doublet cytotoxic chemotherapy (N = 1)                                    |
| Cytotoxic chemotherapy (N = 1)                | Signal transduction pathway inhibitor plus cytotoxic chemotherapy (N = 6) |
| Immunomodulatory (N = 2)                      | Signal transduction pathway inhibitor combination (N = 4)                 |
| Antibody-drug conjugate (N = 1)               |                                                                           |
| Signal transduction pathway inhibitor (N = 6) |                                                                           |

N: number of trials.

**Table S2.** Summary of 7 out of 22 phase 1 trails wherein subject replacement occurred.

|                              | Regimen                                                           | N | Route of Drug Administration |
|------------------------------|-------------------------------------------------------------------|---|------------------------------|
| Single-drug regimens (N = 3) | Cytotoxic chemotherapy                                            | 1 | IV                           |
|                              | Immunomodulatory                                                  | 1 | IV                           |
|                              | Signal transduction pathway inhibitor                             | 1 | Oral                         |
| Combination regimens (N = 4) | Signal transduction pathway inhibitor plus cytotoxic chemotherapy | 3 | IV + Oral<br>SQ + SQ         |
|                              | Signal transduction pathway inhibitor combination                 | 1 | Oral + Oral                  |

N: number of trials. IV: Intravenous. SQ: subcutaneous.

**Table S3.** Baseline Royal Marsden Score and outcomes.

| Variable         | Level | 0/1        | 2/3       | Overall    | p-value |
|------------------|-------|------------|-----------|------------|---------|
| DLT              | Yes   | 5 (6.6%)   | 1 (11.1%) | 6 (6.5%)   | 0.500   |
|                  | No    | 71 (93.4%) | 8 (88.9%) | 86 (93.5%) |         |
| CYCLE1 completed | Yes   | 53 (69.7%) | 5 (55.6%) | 62 (67.4%) | 0.456   |
|                  | No    | 23 (30.3%) | 4 (44.4%) | 30 (32.6%) |         |
| Replacement      | No    | 68 (89.5%) | 6 (66.7%) | 80 (87%)   | 0.089   |
|                  | Yes   | 8 (10.5%)  | 3 (33.3%) | 12 (13%)   |         |
| SAE              | No    | 57 (75%)   | 7 (77.8%) | 69 (75%)   | 1.000   |
|                  | Yes   | 19 (25%)   | 2 (22.2%) | 23 (25%)   |         |

DLT: Dose limiting toxicity, SAE: Serious Adverse Event.

**Table S4.** EORTC QLQ C-30 questionnaire subcomponents and risk of SAE.

| EORTC QLQ C-30       |          |       | Standard |      |        |           |          |         |         |         |
|----------------------|----------|-------|----------|------|--------|-----------|----------|---------|---------|---------|
| Component †          | Variable | Level | N Obs *  | N ** | Mean ^ | Deviation | Median ^ | Minimum | Maximum | p-value |
| Global Health Status | SAE      | No    | 69       | 64   | 68.10  | 17.67     | 66.67    | 25.00   | 100.00  | 0.1143  |
|                      |          | Yes   | 23       | 23   | 60.51  | 20.60     | 66.67    | 16.67   | 100.00  |         |
| Functional scales    | SAE      | No    | 69       | 64   | 77.91  | 15.80     | 82.50    | 36.67   | 100.00  | 0.0765  |
|                      |          | Yes   | 23       | 23   | 71.90  | 16.29     | 71.67    | 41.67   | 100.00  |         |
| Symptom scales       | SAE      | No    | 69       | 64   | 22.75  | 13.80     | 20.80    | 0.00    | 59.62   | 0.0543  |
|                      |          | Yes   | 23       | 23   | 29.23  | 14.70     | 30.77    | 1.92    | 53.85   |         |

† All of the scales and single-item measures range in score from 0 to 100. A higher score for the global health status QoL represents a higher QoL. A higher score for a functional scale represents a higher/healthier level of functioning. A higher score for a symptom scale/item represents a higher level of symptomatology/problems. SAE: Serious Adverse Event. N Obs \*: Total number of patients. N \*\*: Non-missing observations. ^ Mean and median reflect 'N'.

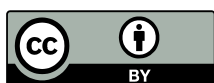

© 2017 by the authors; licensee MDPI, Basel, Switzerland. This article is an open access article distributed under the terms and conditions of the Creative Commons by Attribution (CC-BY) license (<http://creativecommons.org/licenses/by/4.0/>).
